# Supplementary material for: A statistical design approach to the sol–gel synthesis of (amino)organosilane hybrid nanoparticles
Source: Royal Society of Chemistry journal article supplement (doi:10.1039/d3cp01404e), 2023-01-01
Supplement: d3cp01404e1.pdf [file d3cp01404e1.pdf]

Table 1S. Plan of the experiment and pH

| Sample | Temperature (A),<br>C° | Time (B), h | APTES/TEOS ratio (C) | pH  |
|--------|------------------------|-------------|----------------------|-----|
| T-A 1  | 20                     | 1           | 0.25                 | 8.2 |
| T-A 2  | 20                     | 3           | 0.5                  | 7.9 |
| T-A 3  | 20                     | 6           | 1                    | 6.9 |
| T-A 4  | 20                     | 18          | 1.5                  | 6.4 |
| T-A 5  | 20                     | 24          | 2                    | 7.7 |
| T-A 6  | 30                     | 1           | 0.5                  | 9.0 |
| T-A 7  | 30                     | 3           | 1                    | 8.7 |
| T-A 8  | 30                     | 6           | 1.5                  | 8.8 |
| T-A 9  | 30                     | 18          | 2                    | 8.5 |
| T-A 10 | 30                     | 24          | 0.25                 | 7.6 |
| T-A 11 | 40                     | 1           | 1                    | 7.3 |
| T-A 12 | 40                     | 3           | 1.5                  | 6.6 |
| T-A 13 | 40                     | 6           | 2                    | 8.7 |
| T-A 14 | 40                     | 18          | 0.25                 | 8.9 |
| T-A 15 | 40                     | 24          | 0.5                  | 8.3 |
| T-A 16 | 50                     | 1           | 1.5                  | 8.6 |
| T-A 17 | 50                     | 3           | 2                    | 9.4 |
| T-A 18 | 50                     | 6           | 0.25                 | 7.7 |
| T-A 19 | 50                     | 18          | 0.5                  | 8.8 |
| T-A 20 | 50                     | 24          | 1                    | 8.2 |
| T-A 21 | 60                     | 1           | 2                    | 8.0 |
| T-A 22 | 60                     | 3           | 0.25                 | 7.4 |
| T-A 23 | 60                     | 6           | 0.5                  | 9.0 |
| T-A 24 | 60                     | 18          | 1                    | 9.2 |
| T-A 25 | 60                     | 24          | 1.5                  | 8.1 |

Table 2S - Values of statistical characteristics for choosing the degree of models for the yield of the reaction product (Y1) and zeta potential (Y2)

| Source    | p-value           | Adjusted R <sup>2</sup> | Predicted R <sup>2</sup> |
|-----------|-------------------|-------------------------|--------------------------|
|           | <b>Y1</b>         |                         |                          |
| Linear    | 0.0332            | 0.2386                  | 0.0534                   |
| Quadratic | <b>&lt;0.0001</b> | <b>0.8451</b>           | <b>0.6874</b>            |
| Cubic     | 0.2671            | 0.8992                  | -1.5976                  |
|           | <b>Y2</b>         |                         |                          |
| Linear    | 0.1607            | 0.101                   | -0.1559                  |
| Quadratic | <b>0.0002</b>     | <b>0.7328</b>           | <b>0.5863</b>            |
| Cubic     | 0.8519            | 0.5889                  | -18.5102                 |

Table 3S - The result of ANOVA analysis for the yield of the finished reaction product

|                                    | <b>Sum square</b> | <b>of</b> | <b>Degree freedom</b> | <b>of</b> | <b>Mean square</b> | <b>F-value</b> | <b>p-value</b> |
|------------------------------------|-------------------|-----------|-----------------------|-----------|--------------------|----------------|----------------|
| <b>Model</b>                       | 40,67             |           | 9                     |           | 4,52               | 15,54          | < 0.0001       |
| <b>A-temp</b>                      | 0,1687            |           | 1                     |           | 0,1687             | 0,5803         | 0,4580         |
| <b>B-time</b>                      | 0,1603            |           | 1                     |           | 0,1603             | 0,5512         | 0,4693         |
| <b>C-<br/>APTES/TEOS<br/>ratio</b> | 12,73             |           | 1                     |           | 12,73              | 43,77          | < 0.0001       |
| <b>AB</b>                          | 0,0759            |           | 1                     |           | 0,0759             | 0,2609         | 0,6169         |
| <b>AC</b>                          | 0,0812            |           | 1                     |           | 0,0812             | 0,2793         | 0,6049         |
| <b>BC</b>                          | 0,1549            |           | 1                     |           | 0,1549             | 0,5328         | 0,4767         |
| <b>A<sup>2</sup></b>               | 0,3546            |           | 1                     |           | 0,3546             | 1,22           | 0,2868         |
| <b>B<sup>2</sup></b>               | 0,1240            |           | 1                     |           | 0,1240             | 0,4264         | 0,5237         |
| <b>C<sup>2</sup></b>               | 10,19             |           | 1                     |           | 10,19              | 35,06          | < 0.0001       |
| <b>Residual</b>                    | 4,36              |           | 15                    |           | 0,2907             |                |                |
| <b>Cor Total</b>                   | 45,03             |           | 24                    |           |                    |                |                |

Table 4S- Result of ANOVA analysis for zeta potential

|                    | Sum of square | Degree of freedom | Mean square | F-value | p-value  |
|--------------------|---------------|-------------------|-------------|---------|----------|
| <b>Model</b>       | 3191,13       | 9                 | 354,57      | 8,31    | 0,0002   |
| A-temp             | 283,89        | 1                 | 283,89      | 6,66    | 0,0209   |
| B-time             | 152,08        | 1                 | 152,08      | 3,57    | 0,0785   |
| C-APTES/TEOS ratio | 574,31        | 1                 | 574,31      | 13,47   | 0,0023   |
| AB                 | 2073,57       | 1                 | 2073,57     | 48,62   | < 0.0001 |
| AC                 | 1558,59       | 1                 | 1558,59     | 36,54   | < 0.0001 |
| BC                 | 1172,52       | 1                 | 1172,52     | 27,49   | < 0.0001 |
| A <sup>2</sup>     | 906,54        | 1                 | 906,54      | 21,25   | 0,0003   |
| B <sup>2</sup>     | 1525,73       | 1                 | 1525,73     | 35,77   | < 0.0001 |
| C <sup>2</sup>     | 849,75        | 1                 | 849,75      | 19,92   | 0,0005   |
| <b>Residual</b>    | 639,77        | 15                | 42,65       |         |          |
| <b>Cor Total</b>   | 3830,9        | 24                |             |         |          |

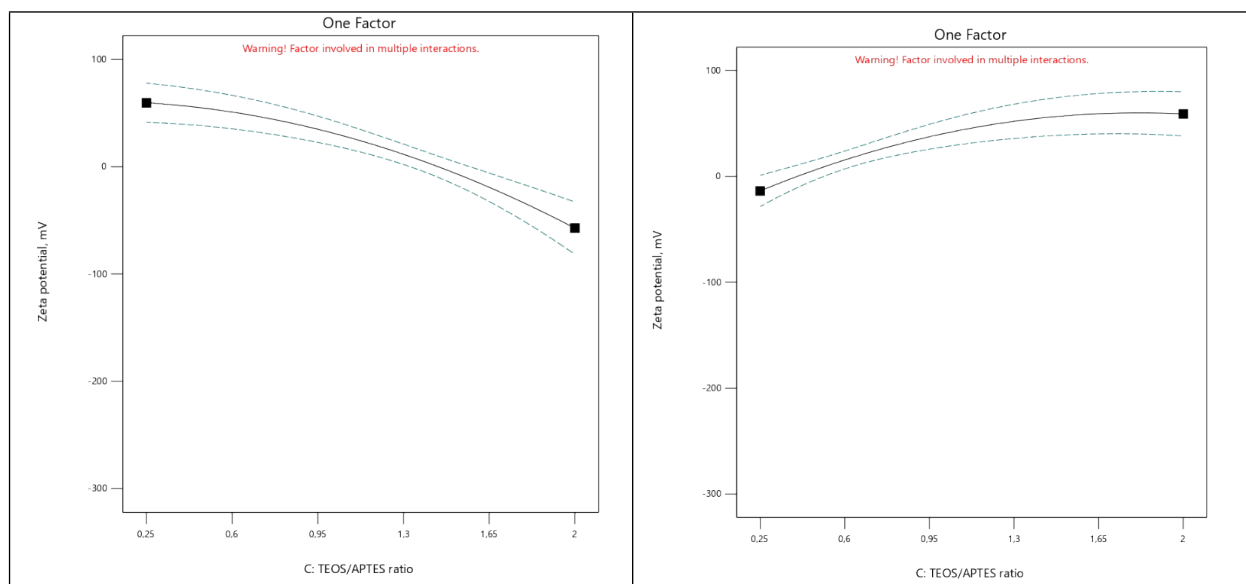

Figure 1S. Zeta potential versus APTES/TEOS ratio at minimum (a, 20°C) and maximum (b, 60°C) temperatures (polymerization time 12 h)

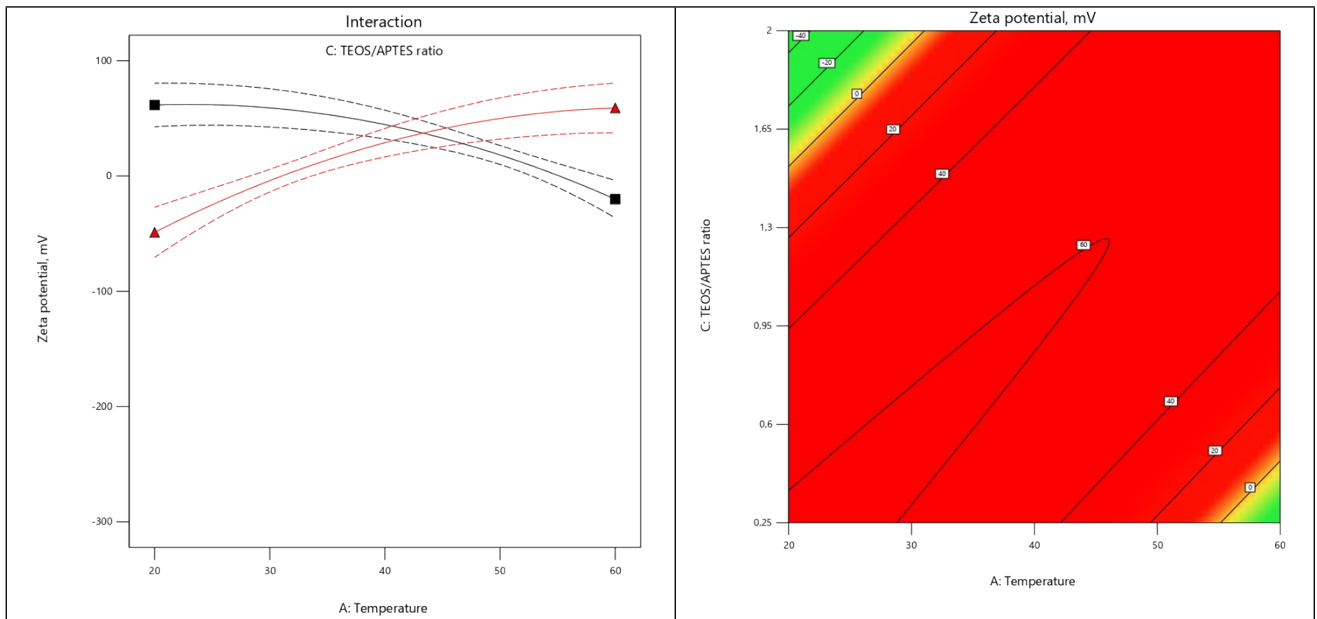

Figure 2S.a) Zeta potential versus temperature of polymerization at minimum (0.25, black square) and maximum (2, red triangle) APTES/TEOS ratio (polymerization time 12 h) b) a plane describing the

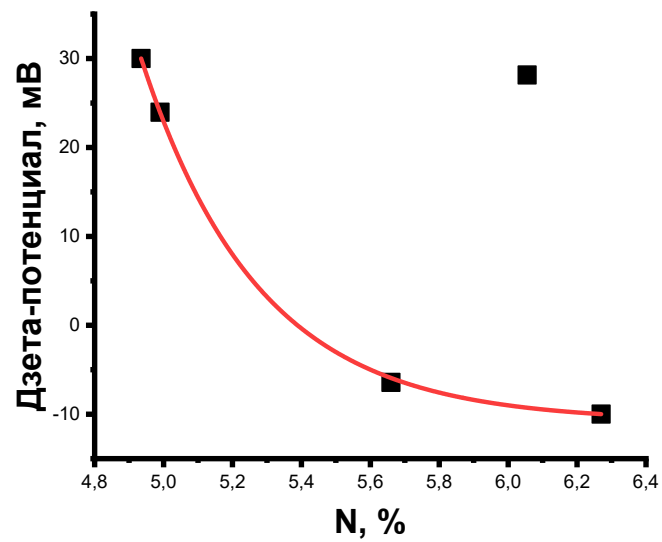

dependence of the zeta potential on the ratio of APTES/TEOS and temperature

Fig. 3S Dependence of the zeta potential on the percentage of nitrogen

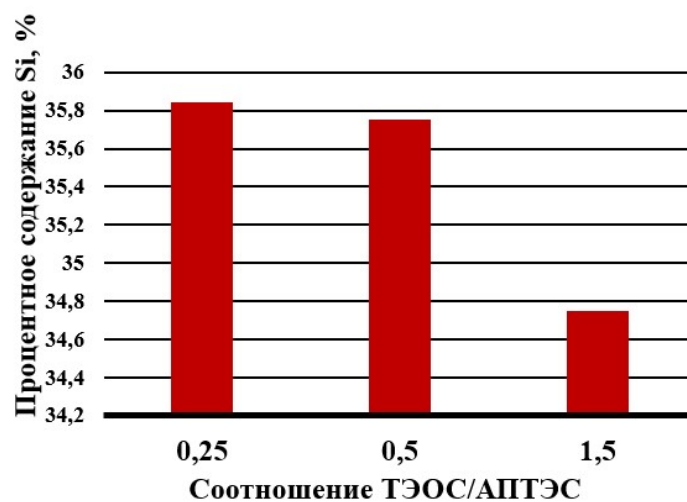

Figure 4S - The dependence of the percentage of silicon on the ratio of APTES/TEOS

Table 5S - Theoretical and actual APTES/TEOS ratio

| Sample | APTES/TEOS ratio theoretical, mol/mol | APTES/TEOS ratio. actual, mol/mol |
|--------|---------------------------------------|-----------------------------------|
| TA 14  | 1:0.25                                | 1:0.39                            |
| TA 18  | 1:0.25                                | 1:0.37                            |
| TA 6   | 1:0.5                                 | 1:0.51                            |
| TA 15  | 1:0.5                                 | 1:0.46                            |
| TA 25  | 1:1.5                                 | 1:0.56                            |

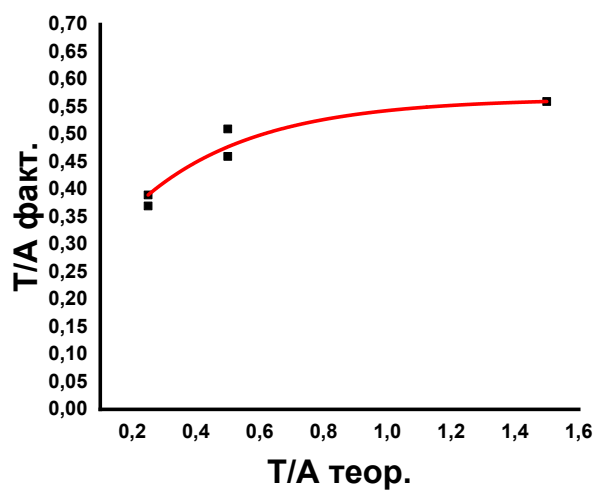

Figure 5S - Dependence of the actual TEOS / APTES ratio on the theoretical

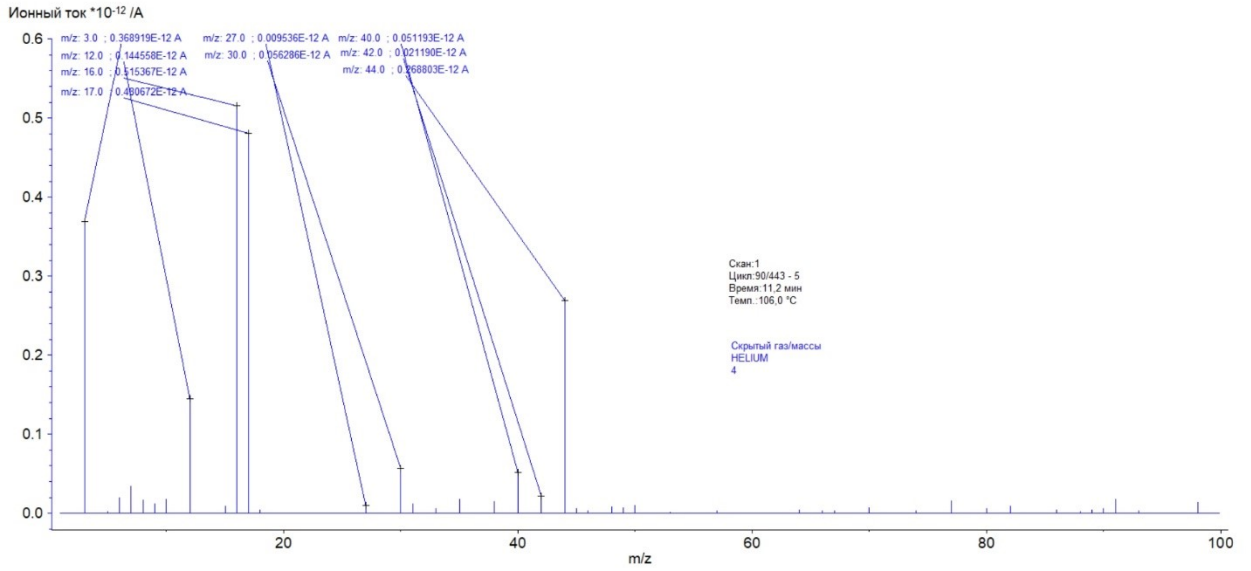

AT 6, t=481.4°C

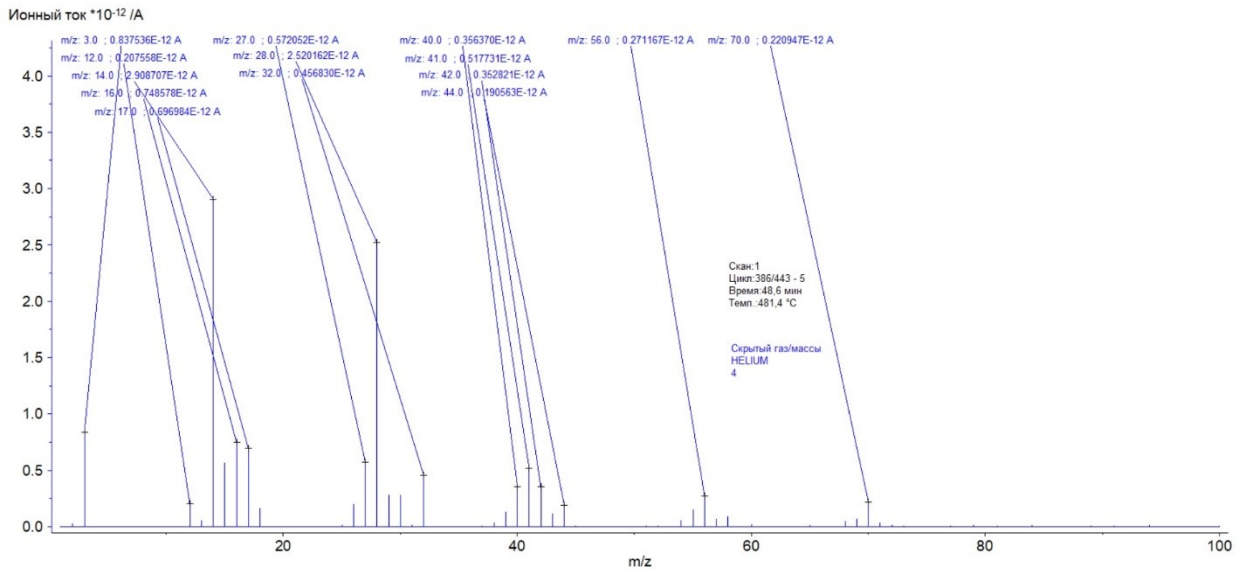

AT 14, t=538.3°C

Ионный ток \*10<sup>-12</sup> /A

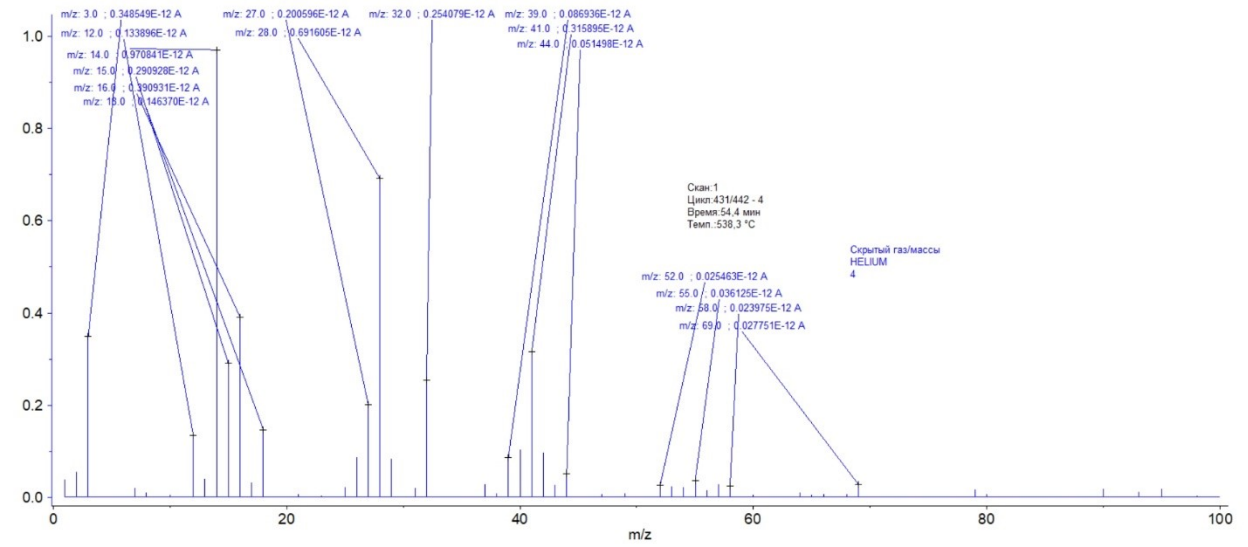

AT 15, t=94.5°C

Ионный ток \*10<sup>-12</sup> /A

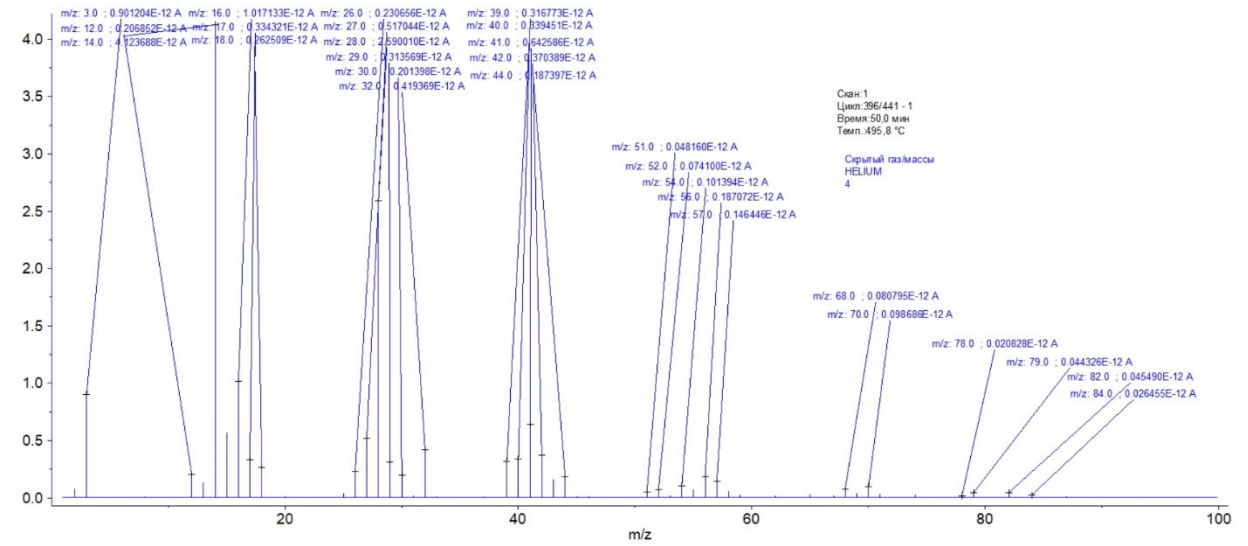

AT 18, t=532.0°C

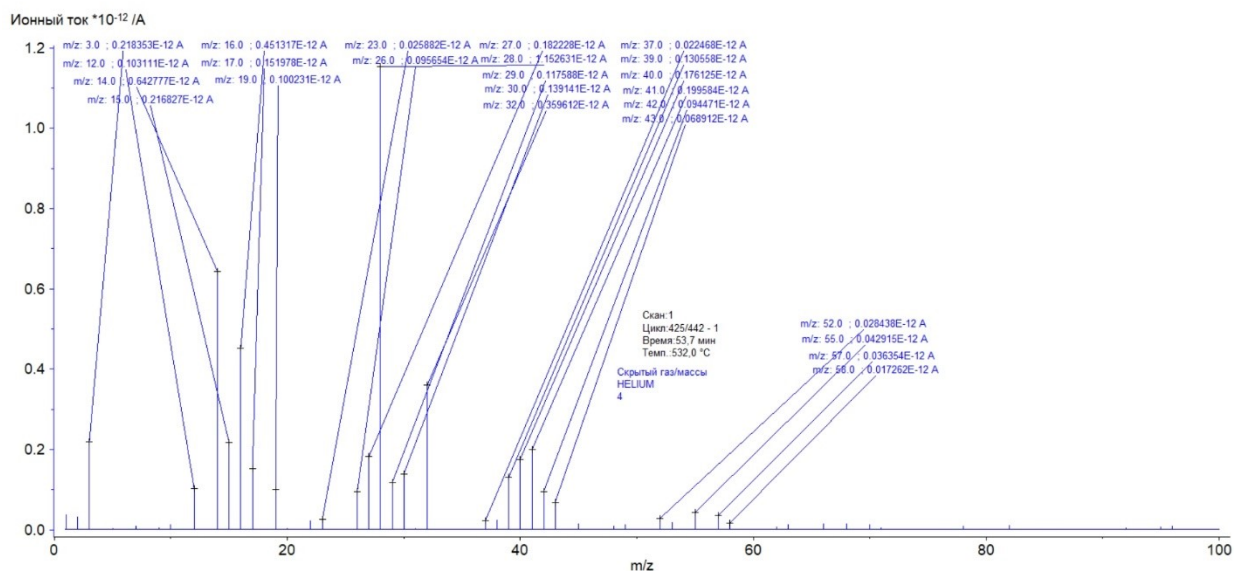

AT 25, t=97.0°C

Figure 6S. Mass-specter's of NPs

Table 6S. Areas under IR-spectra

|              | Si-O-Si |        | -CH <sub>2</sub> |      | NH <sub>2</sub> - |     | OH-   |      |
|--------------|---------|--------|------------------|------|-------------------|-----|-------|------|
|              | FTIR    | ATR    | FTIR             | ATR  | FTIR              | ATR | FTIR  | ATR  |
| <b>TA 14</b> | 155,54  | 96,34  | 37,59            | 2,67 | 6,48              | -   | 38,34 | 3,05 |
| <b>TA 15</b> | 149,07  | 83,50  | 33,69            | 2,65 | 20,8              | -   | 46,05 | 2,88 |
| <b>TA 18</b> | 142,96  | 110,94 | 22,87            | 2,73 | 2,74              | -   | 26,49 | 3,28 |
| <b>TA 25</b> | 84,81   | 10,45  | 17,08            | 0,24 | 15,54             | -   | 29,01 | 0,33 |
| <b>TA 6</b>  | 82,87   | 41,04  | 10,55            | 1,02 | 10,66             | -   | 20,2  | 1,05 |
